# Supplementary material for: Assessment and Spatial Distribution of Urban Ecosystem Functions Applied in Two Czech Cities
Source: MDPI journal article supplement (doi:10.3390/app13095759), 2023-05-06
Supplement: s1 [file s1]

## Supplementary material

**Table S1:** Habitat types and their relative point values according to Seják et al. (2018).

| Code                                          | Habitat type                                                                      | Point value/m2 |
|-----------------------------------------------|-----------------------------------------------------------------------------------|----------------|
| <i>Natural and near-nature habitat types:</i> |                                                                                   |                |
| A1.1                                          | Wind-swept alpine grasslands                                                      | 59             |
| A1.2                                          | Closed alpine grasslands                                                          | 56             |
| A2.1                                          | Alpine heathlands                                                                 | 56             |
| A2.2                                          | Subalpine <i>Vaccinium</i> vegetation                                             | 56             |
| A3                                            | Snow beds                                                                         | 56             |
| A4.1                                          | Subalpine tall grasslands                                                         | 59             |
| A4.2                                          | Subalpine tall-forb vegetation                                                    | 66             |
| A4.3                                          | Subalpine tall-fern vegetation                                                    | 63             |
| A5                                            | Cliff vegetation in the Sudeten cirques                                           | 66             |
| A6A                                           | Acidophilous vegetation of alpine boulder scree                                   | 66             |
| A6B                                           | Acidophilous vegetation of alpine cliffs                                          | 66             |
| A7                                            | <i>Pinus mugo</i> scrub                                                           | 58             |
| A8.1                                          | <i>Salix lapponum</i> subalpine scrub                                             | 59             |
| A8.2                                          | Subalpine deciduous tall scrub                                                    | 56             |
| K1                                            | Willow carrs                                                                      | 36             |
| K2.1                                          | Willow scrub of loamy and sandy river banks                                       | 36             |
| K2.2                                          | Willow scrub of river gravel banks                                                | 52             |
| K3                                            | Tall mesic and xeric scrub                                                        | 33             |
| K4A                                           | Low xeric scrub, primary vegetation on rock outcrops with <i>Cotoneaster</i> spp. | 56             |
| K4B                                           | Low xeric scrub, secondary vegetation with <i>Prunus tenella</i>                  | 56             |
| K4C                                           | Low xeric scrub, other stands                                                     | 56             |
| L1                                            | Alder carrs                                                                       | 55             |
| L2.1                                          | Montane grey alder galleries                                                      | 57             |
| L2.2                                          | Ash-alder alluvial forests                                                        | 42             |
| L2.3                                          | Hardwood forests of lowland rivers                                                | 66             |
| L2.4                                          | Willow-poplar forests of lowland rivers                                           | 65             |
| L3.1                                          | Hercynian oak-hornbeam forests                                                    | 47             |
| L3.2                                          | Polonian oak-hornbeam forests                                                     | 55             |
| L3.3                                          | Pannonian-Carpathian oak-hornbeam forests                                         | 58             |
| L3.3                                          | West Carpathian oak-hornbeam forests                                              | 61             |
| L3.4                                          | Pannonian oak-hornbeam forests                                                    | 42             |
| L4                                            | Ravine forests                                                                    | 45             |
| L5.1                                          | Herb-rich beech forests                                                           | 52             |
| L5.2                                          | Montane sycamore-beech forests                                                    | 62             |
| L5.3                                          | Limestone beech forests                                                           | 38             |
| L5.4                                          | Acidophilous beech forests                                                        | 69             |
| L6.1                                          | Peri-Alpidic basiphilous thermophilous oak forests                                | 72             |
| L6.2                                          | Pannonian thermophilous oak forests on loess                                      | 69             |
| L6.3                                          | Pannonian thermophilous oak forests on sand                                       | 60             |
| L6.4                                          | Central European basiphilous thermophilous oak forests                            | 51             |
| L6.5A                                         | Acidophilous thermophilous oak forests with <i>Genista pilosa</i>                 | 51             |
| L6.5B                                         | Acidophilous thermophilous oak forests without <i>Genista pilosa</i>              | 38             |
| L7.1                                          | Dry acidophilous oak forests                                                      | 41             |
| L7.2                                          | Wet acidophilous oak forests                                                      | 43             |
| L7.3                                          | Subcontinental pine-oak forests                                                   | 53             |
| L7.4                                          | Acidophilous oak forests on sand                                                  | 40             |
| L8.1A                                         | Boreo-continental pine forests with lichens on sand                               | 40             |
| L8.1B                                         | Boreo-continental pine forests, other stands                                      | 61             |
| L8.2                                          | Forest-steppe pine forests                                                        | 58             |
| L8.3                                          | Peri-Alpidic serpentine pine forests                                              | 36             |
| L9.1                                          | Montane Calamagrostis spruce forests                                              | 43             |
| L9.2A                                         | Bog spruce forests                                                                | 43             |
| L9.2B                                         | Waterlogged spruce forests                                                        | 43             |
| L9.3                                          | Montane <i>Athyrium</i> spruce forests                                            | 28             |
| L10.1                                         | Birch mire forests                                                                | 56             |
| L10.2                                         | Pine mire forests with <i>Vaccinium</i>                                           | 56             |
| L10.3                                         | Pine forests of continental mires with <i>Eriophorum</i>                          | 59             |
| L10.4                                         | <i>Pinus rotundata</i> bog forests                                                | 59             |

| Code                                          | Habitat type                                                   | Point value/m2 |
|-----------------------------------------------|----------------------------------------------------------------|----------------|
| <i>Natural and near-nature habitat types:</i> |                                                                |                |
| M1.1                                          | Reed beds of eutrophic still waters                            | 53             |
| M1.2                                          | Halophilous reed and sedge beds                                | 36             |
| M1.3                                          | Eutrophic vegetation of muddy substrata                        | 28             |
| M1.4                                          | Riverine reed vegetation                                       | 33             |
| M1.5                                          | Reed vegetation of brooks                                      | 36             |
| M1.6                                          | Mesotrophic vegetation of muddy substrata                      | 26             |
| M1.7                                          | Tall-sedge beds                                                | 59             |
| M1.8                                          | Calcareous fens with <i>Cladium mariscus</i>                   | 42             |
| M2.1                                          | Vegetation of exposed fi shpond bottoms                        | 42             |
| M2.2                                          | Annual vegetation on wet sand                                  | 47             |
| M2.3                                          | Vegetation of exposed bottoms in warm areas                    | 49             |
| M2.4                                          | Vegetation of annual halophilous grasses                       | 38             |
| M3                                            | Vegetation of perennial amphibious herbs                       | 31             |
| M4.1                                          | Unvegetated river gravel banks                                 | 47             |
| M4.2                                          | River gravel banks with <i>Myricaria germanica</i>             | 42             |
| M4.3                                          | River gravel banks with <i>Calamagrostis pseudophragmites</i>  | 41             |
| M5                                            | Petasites fringes of montane brooks                            | 33             |
| M6                                            | Muddy river banks                                              | 33             |
| M7                                            | Herbaceous fringes of lowland rivers                           | 62             |
| R1.1                                          | Meadow springs with tufa formation                             | 56             |
| R1.2                                          | Meadow springs without tufa formation                          | 50             |
| R1.3                                          | Forest springs with tufa formation                             | 53             |
| R1.4                                          | Forest springs without tufa formation                          | 56             |
| R1.5                                          | Subalpine springs                                              | 56             |
| R2.1                                          | Calcareous fens                                                | 53             |
| R2.2                                          | Acidic moss-rich fens                                          | 56             |
| R2.3                                          | Transitional mires                                             | 66             |
| R2.4                                          | Peatsoils with <i>Rhynchospora alba</i>                        | 66             |
| R3.1                                          | Open raised bogs                                               | 66             |
| R3.2                                          | Raised bogs with <i>Pinus mugo</i>                             | 63             |
| R3.3                                          | Bog hollows                                                    | 42             |
| R3.4                                          | Degraded raised bogs                                           | 56             |
| S1.1                                          | Chasmophytic vegetation of calcareous cliffs and boulder scree | 46             |
| S1.2                                          | Chasmophytic vegetation of siliceous cliffs and boulder scree  | 47             |
| S1.3                                          | Tall grasslands on rock ledges                                 | 44             |
| S1.4                                          | Tall-forb vegetation of fi ne-soil-rich boulder scree          | 46             |
| S1.5                                          | <i>Ribes alpinum</i> scrub on cliffs and boulder scree         | 43             |
| S2A                                           | Mobile scree of basic rocks                                    | 43             |
| S2B                                           | Mobile scree of acidis rocks                                   | 40             |
| S3A                                           | Caves open to the public                                       | 40             |
| S3B                                           | Caves not open to the public                                   | 33             |
| T1.1                                          | Mesic <i>Arrhenatherum</i> meadows                             | 39             |
| T1.2                                          | Montane <i>Trisetum</i> meadows                                | 39             |
| T1.3                                          | <i>Cynosurus</i> pastures                                      | 46             |
| T1.4                                          | Alluvial <i>Alopecurus</i> meadows                             | 49             |
| T1.5                                          | Wet <i>Cirsium</i> meadows                                     | 46             |
| T1.6                                          | Wet <i>Filipendula</i> grasslands                              | 66             |
| T1.7                                          | Continental inundated meadows                                  | 63             |
| T1.8                                          | Continental tall-forb vegetation                               | 63             |
| T1.9                                          | Intermittently wet <i>Molinia</i> meadows                      | 56             |
| T1.10                                         | Vegetation of wet disturbed soils                              | 50             |

| Code                                          | Habitat type                                                                                                                          | Point value/m2 |
|-----------------------------------------------|---------------------------------------------------------------------------------------------------------------------------------------|----------------|
| <i>Natural and near-nature habitat types:</i> |                                                                                                                                       |                |
| T2.1                                          | Subalpine <i>Nardus</i> grasslands                                                                                                    | 53             |
| T2.2                                          | Montane <i>Nardus</i> grasslands with alpine species                                                                                  | 39             |
| T2.3A                                         | Submontane and montane <i>Nardus</i> grasslands with scattered <i>Juniperus communis</i> vegetation                                   | 39             |
| T2.3B                                         | Submontane and montane <i>Nardus</i> grasslands without <i>Juniperus communis</i>                                                     | 66             |
| T3.1                                          | Rock-outcrop vegetation with <i>Festuca pallens</i>                                                                                   | 69             |
| T3.2                                          | <i>Sesleria</i> grasslands                                                                                                            | 84             |
| T3.3A                                         | Sub-Pannonian steppic grasslands                                                                                                      | 84             |
| T3.3B                                         | Pannonian loess steppic grasslands                                                                                                    | 84             |
| T3.3C                                         | Narrow-leaved dry grasslands with significant occurrence of orchids                                                                   | 84             |
| T3.3D                                         | Narrow-leaved dry grasslands without significant occurrence of orchids                                                                | 63             |
| T3.4A                                         | Broad-leaved dry grasslands with significant occurrence of orchids and with <i>Juniperus communis</i>                                 | 63             |
| T3.4B                                         | Broad-leaved dry grasslands without significant occurrence of orchids and with <i>Juniperus communis</i>                              | 63             |
| T3.4C                                         | Broad-leaved dry grasslands with significant occurrence of orchids and without <i>Juniperus communis</i>                              | 63             |
| T3.4D                                         | Broad-leaved dry grasslands without significant occurrence of orchids and without <i>Juniperus communis</i>                           | 56             |
| T3.5A                                         | Acidophilous dry grasslands with significant occurrence of orchids                                                                    | 56             |
| T3.5B                                         | Acidophilous dry grasslands without significant occurrence of orchids                                                                 | 59             |
| T4.1                                          | Dry herbaceous fringes                                                                                                                | 41             |
| T4.2                                          | Mesic herbaceous fringes                                                                                                              | 44             |
| T5.1                                          | Annual vegetation on sandy soils                                                                                                      | 41             |
| T5.2                                          | Open sand grasslands with <i>Corynephorus canescens</i>                                                                               | 50             |
| T5.3                                          | <i>Festuca</i> sand grasslands                                                                                                        | 63             |
| T5.4                                          | Pannonian sand steppe grasslands                                                                                                      | 31             |
| T5.5                                          | Submontane acidophilous grasslands                                                                                                    | 49             |
| T6.1A                                         | Acidophilous vegetation of vernal therophytes and succulents with dominance of <i>Jovibarba globifera</i>                             | 49             |
| T6.1B                                         | Acidophilous vegetation of vernal therophytes and succulents without dominance of <i>Jovibarba gl.</i>                                | 59             |
| T6.2A                                         | Basiphilous vegetation of vernal therophytes and succulents with dominance of <i>Jovibarba globifera</i>                              | 59             |
| T6.2B                                         | Basiphilous vegetation of vernal therophytes and succulents without dominance of <i>Jovibarba globifera</i>                           | 73             |
| T7                                            | Inland salt marshes                                                                                                                   | 56             |
| T8.1A                                         | Dry lowland and colline heaths with occurrence of <i>Juniperus communis</i>                                                           | 56             |
| T8.1B                                         | Dry lowland and colline heaths without occurrence of <i>Juniperus communis</i>                                                        | 41             |
| T8.2A                                         | Secondary submontane and montane heaths with occurrence of <i>Juniperus communis</i>                                                  | 41             |
| T8.2B                                         | Secondary submontane and montane heaths without occurrence of <i>Juniperus communis</i>                                               | 49             |
| T8.3                                          | Vaccinium vegetation of cliffs and boulder scree                                                                                      | 47             |
| V1A                                           | Macrophyte vegetation of naturally eutrophic and mesotrophic still waters with <i>Hydrocharis morsus-ranae</i>                        | 47             |
| V1B                                           | Macrophyte vegetation of naturally eutrophic and mesotrophic still waters with <i>Stratiotes aloides</i>                              | 47             |
| V1C                                           | Macrophyte vegetation of naturally eutrophic and mesotrophic still waters with <i>Utricularia australis</i> or <i>U.</i>              | 47             |
| V1D                                           | Macrophyte vegetation of naturally eutrophic and mesotrophic still waters with <i>Salvinia natans</i>                                 | 47             |
| V1E                                           | Macrophyte vegetation of naturally eutrophic and mesotrophic still waters with <i>Aldrovanda vesiculosa</i>                           | 47             |
| V1F                                           | Macrophyte vegetation of naturally eutrophic and mesotrophic still waters without species specific to                                 | 47             |
| V1G                                           | Macrophyte vegetation of naturally eutrophic and mesotrophic still waters without macrophyte species valuable for nature conservation | 53             |
| V2A                                           | Macrophyte vegetation of shallow still waters with dominant <i>Batrachium</i> spp.                                                    | 53             |
| V2B                                           | Macrophyte vegetation of shallow still waters with dominant <i>Hottonia palustris</i>                                                 | 53             |
| V2C                                           | Macrophyte vegetation of shallow still waters, other stands                                                                           | 59             |
| V3                                            | Macrophyte vegetation of oligotrophic lakes and pools                                                                                 | 56             |
| V4A                                           | Macrophyte vegetation of water streams, actually present                                                                              | 56             |
| V4B                                           | Macrophyte vegetation of water streams, potential habitat                                                                             | 56             |
| V5                                            | <i>Charophyceae</i> vegetation                                                                                                        | 50             |
| V6                                            | <i>Isoetes</i> vegetation                                                                                                             | 50             |

| Code                                  | Habitat type                                                                   | Point value/m2 |
|---------------------------------------|--------------------------------------------------------------------------------|----------------|
| <i>Distant natural habitat types:</i> |                                                                                |                |
| XV1                                   | Nature distant ponds and water reservoirs                                      | 14             |
| XV2                                   | Nature distant water streams and rivers                                        | 17             |
| XM                                    | Nature distant wetlands and peatlands                                          | 19             |
| XS1                                   | Abandoned mining areas with rock substrates                                    | 16             |
| XS2                                   | Excavated stone plains, retaining walls, demolition sites                      | 16             |
| XS3                                   | Short-term abandoned artificially exposed soil substrates                      | 16             |
| XT1                                   | Nature distant mesophilic meadows and pastures                                 | 13             |
| XT2                                   | Nature distant wet meadows, pastures and fallows                               | 17             |
| XT3                                   | Nature distant dry lawns, hedgerows and heaths                                 | 23             |
| XK1                                   | Nature distant mesophilic and wet shrubs                                       | 20             |
| XK2                                   | Nature distant dry shrubs                                                      | 23             |
| XK3                                   | Woody vegetation on agricultural and other land                                | 20             |
| XK4                                   | Orchards, hop fields and vineyards                                             | 16             |
| XL1                                   | Production forests                                                             | 20             |
| XL2                                   | Clearings in production forests                                                | 11             |
| XL3                                   | Alleys and tree groups                                                         | 19             |
| <i>Unnatural habitat types:</i>       |                                                                                |                |
| X1.1                                  | Unnatural, technically solved water reservoirs                                 | 11             |
| X1.2                                  | Unnatural channelized water courses                                            | 10             |
| X3.2                                  | Operated rocks and quarries with sporadic vegetation                           | 5              |
| X3.3                                  | Gap vegetation of semi-permeable paved and gravel surfaces                     | 9              |
| X4.1                                  | Arable land                                                                    | 9              |
| X4.2                                  | Perennial crops                                                                | 11             |
| X4.3                                  | Ruderal tall stands                                                            | 11             |
| X4.4                                  | Ruderal low stands                                                             | 9              |
| X5.1                                  | Intensively cultivated lawns of ornamental gardens and sports fields           | 9              |
| X5.2                                  | Vegetable gardens and gardening colonies                                       | 11             |
| X5.3                                  | Intensive orchards, hop fields and vineyards                                   | 9              |
| X6.1                                  | Urban green areas, ornamental gardens, parks, cemeteries                       | 11             |
| X6.2                                  | Forest and fruit nurseries, plantations of fast-growing trees                  | 7              |
| X6.3                                  | Unnatural stands of allochthonous trees                                        | 11             |
| <i>Human-made habitat types:</i>      |                                                                                |                |
| XX1.1                                 | Treatment and sludge tanks                                                     | 0              |
| XX1.2                                 | Chemically degraded waters                                                     | 0              |
| XX1.3                                 | Piped flows                                                                    | 0              |
| XX2                                   | Chemically degraded wetlands                                                   | 0              |
| XX3.1                                 | Continuous built up area                                                       | 0              |
| XX3.2                                 | Impermeable areas and areas permanently without vegetation                     | 0              |
| XX4.1                                 | Landfills in the inner city                                                    | 0              |
| XX4.2                                 | Chemically degraded areas and open surfaces of landfills for abiotic materials | 0              |
